# Supplementary material for: Clinical Severity of SARS-CoV-2 Omicron Variant Compared with Delta among Hospitalized COVID-19 Patients in Belgium during Autumn and Winter Season 2021–2022
Source: MDPI journal article supplement (doi:10.3390/v14061297), 2022-06-14
Supplement: s1 [file s1]

**Table S1.** Standardized risk per variant (in %), Relative Risk (RR) and Risk Difference (RD, in %) estimates and 95% Confidence Interval (CI) for severity outcomes within a multi-center cohort study to assess the impact of SARS-CoV-2 variants on COVID-19 disease severity among hospitalized patients without a documented previous infection in Belgium. This sensitivity analysis was based on a subgroup of 941 hospitalized patients (433 patients infected with the Omicron variant and 508 patients infected with the Delta variant).

| Outcome                      | Standardized Risk<br>[95% CI] in % |                   | RR [95% CI]       | RD [95% CI]        |
|------------------------------|------------------------------------|-------------------|-------------------|--------------------|
|                              | Omicron                            | Delta             |                   |                    |
| Severe COVID-19 <sup>1</sup> | 22.5 [12.1; 32.8]                  | 35.2 [26.5; 44.0] | 0.64 [0.30; 0.98] | -12.8 [-26.8; 1.3] |
| ICU admission                | 12.4 [3.0; 21.8]                   | 21.7 [17.6; 25.9] | 0.57 [0.11; 1.03] | -9.4 [-19.2; 0.5]  |
| In-hospital mortality        | 19.1 [9.3; 29.0]                   | 24.1 [16.2; 32.1] | 0.79 [0.30; 1.29] | -5.0 [-17.3; 7.3]  |

<sup>1</sup> Defined as either intensive care unit (ICU) admission, and/or acute respiratory distress syndrome (ARDS), and/or in-hospital mortality.

**Table S2.** Standardized risk per variant (in %), Relative Risk (RR) and Risk Difference (RD, in %) estimates and 95% Confidence Interval (CI) for severity outcomes within a multi-center cohort study to assess the impact of SARS-CoV-2 variants on COVID-19 disease severity among hospitalized patients with a confirmed (through whole genome sequencing) Omicron or Delta infection in Belgium. This sensitivity analysis was based on a subgroup of 619 hospitalized patients (251 patients infected with the Omicron variant and 368 patients infected with the Delta variant).

| Outcome                      | Standardized Risk<br>[95% CI] in % |                   | RR [95% CI]       | RD [95% CI]         |
|------------------------------|------------------------------------|-------------------|-------------------|---------------------|
|                              | Omicron                            | Delta             |                   |                     |
| Severe COVID-19 <sup>1</sup> | 25.9 [13.0; 38.8]                  | 39.3 [30.5; 48.1] | 0.66 [0.29; 1.03] | -13.4 [-29.0; 2.2]  |
| ICU admission                | 11.2 [0.0; 23.7]                   | 25.0 [20.0; 29.9] | 0.45 [0.00; 0.97] | -13.8 [-26.6; -1.0] |
| In-hospital mortality        | 24.6 [12.6; 36.7]                  | 28.4 [18.0; 38.9] | 0.87 [0.00; 2.31] | -3.8 [-22.2; 14.5]  |

<sup>1</sup> Defined as either intensive care unit (ICU) admission, and/or acute respiratory distress syndrome (ARDS), and/or in-hospital mortality.

**Table S3.** Standardized risk per variant (in %), Relative Risk (RR) and Risk Difference (RD, in %) estimates and 95% Confidence Interval (CI) for severity outcomes within a multi-center cohort study to assess the impact of SARS-CoV-2 variants on COVID-19 disease severity among hospitalized patients in Belgium when only considering variant information obtained through baseline genomic surveillance. This sensitivity analysis was based on a subgroup of 448 hospitalized patients (183 patients infected with the Omicron variant and 265 patients infected with the Delta variant).

| Outcome                      | Standardized Risk<br>[95% CI] in % |                   | RR [95% CI]       | RD [95% CI]        |
|------------------------------|------------------------------------|-------------------|-------------------|--------------------|
|                              | Omicron                            | Delta             |                   |                    |
| Severe COVID-19 <sup>1</sup> | 26.4 [10.2; 42.6]                  | 31.2 [24.7; 37.7] | 0.85 [0.26; 1.43] | -4.8 [-22.2; 12.6] |
| ICU admission                | 8.3 [0.0; 23.7]                    | 23.6 [16.2; 31.1] | 0.35 [0.00; 1.12] | -15.3 [-32.2; 1.5] |
| In-hospital mortality        | 25.4 [7.7; 43.1]                   | 21.5 [11.0; 32.0] | 1.18 [0.00; 3.29] | 3.9 [-20.7; 28.5]  |

<sup>1</sup> Defined as either intensive care unit (ICU) admission, and/or acute respiratory distress syndrome (ARDS), and/or in-hospital mortality.
